# Supplementary material
Source: PubMed Central journal article supplement (PMC4191023)
Supplement: JCI74237sd.pdf [file JCI74237sd.pdf]

# Supplemental Figure 1

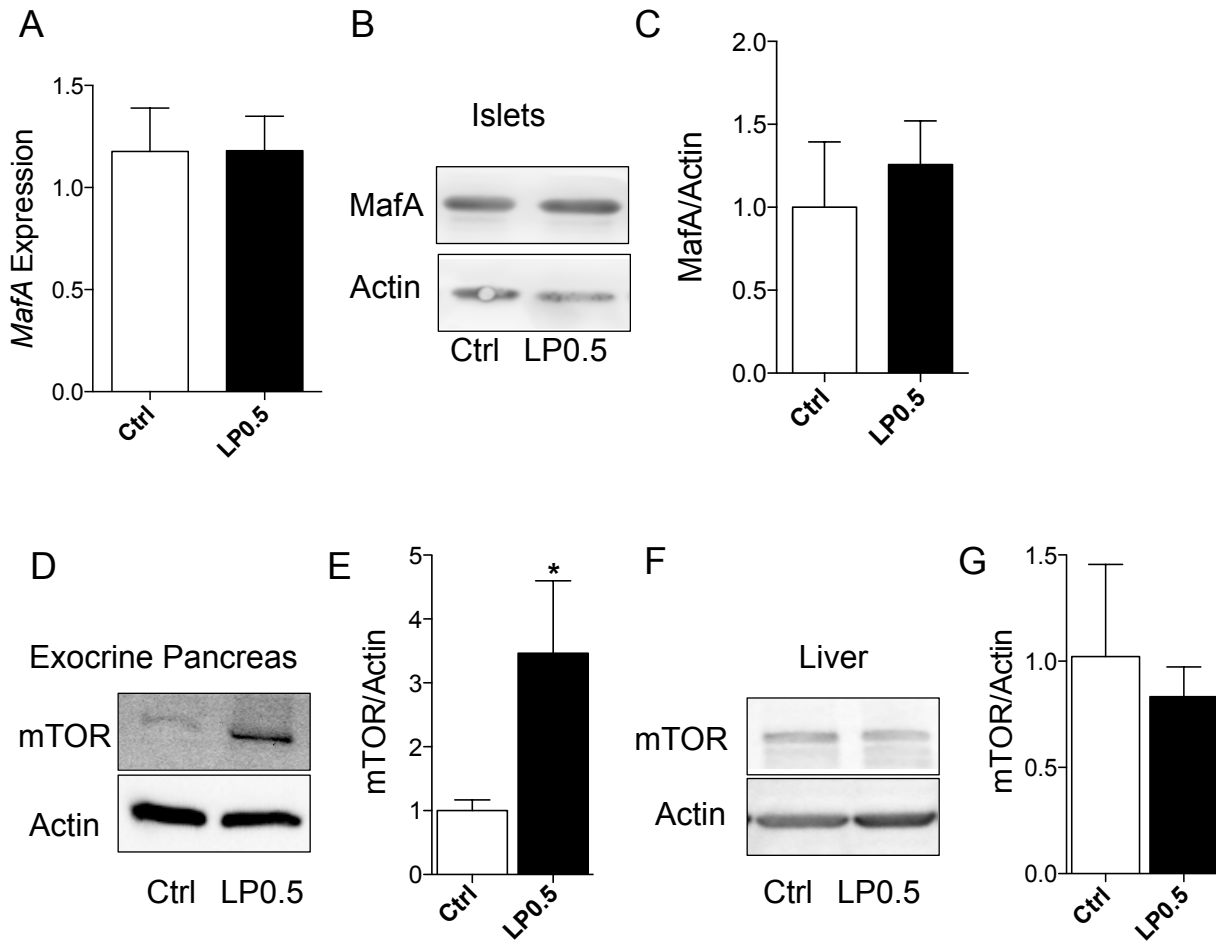

# Supplemental Figure 2

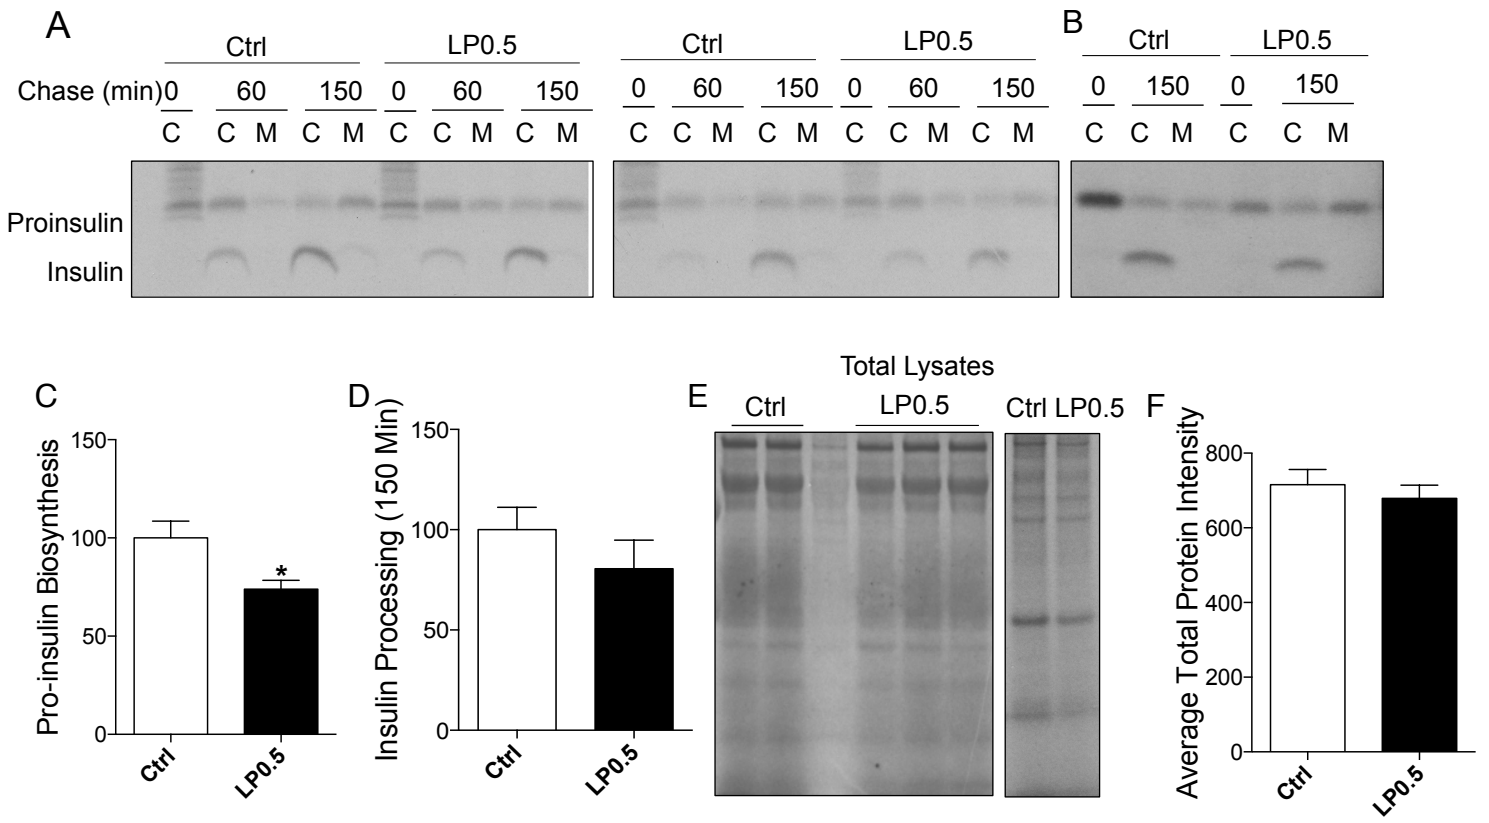

Supplemental Figure 3

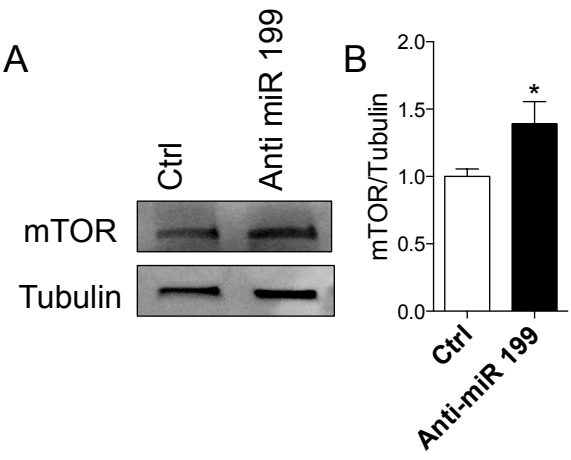

## Supplemental Figure 4

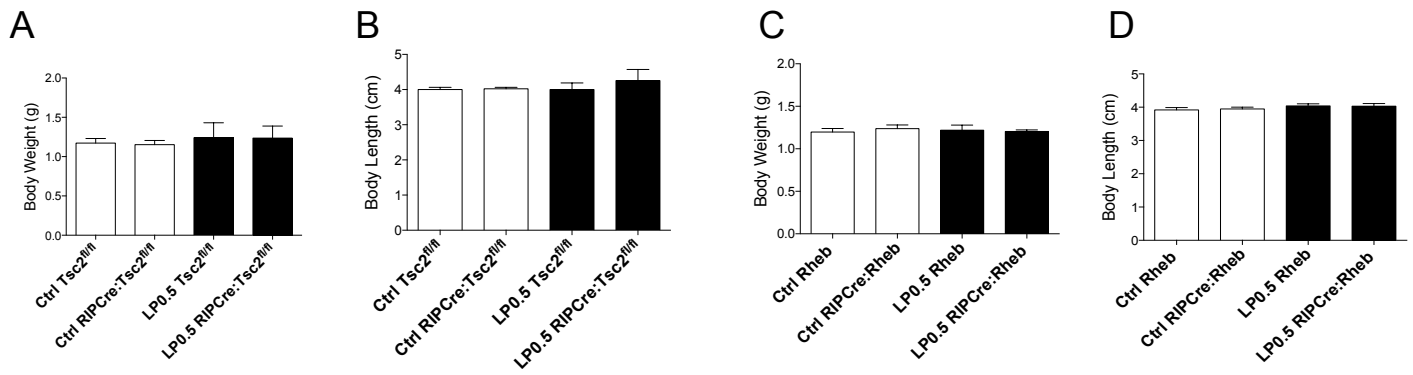

### Supplemental Figure 4. Phenotype of newborn mice harboring either a *Tsc2* deletion or *Rheb*-overexpression specifically in $\beta$ -cells.

(A-B) Body weight or length of wildtype *Tsc2<sup>fl/fl</sup>* Ctrl or LP0.5 and *RIPCre;Tsc2<sup>fl/fl</sup>* Ctrl or LP0.5 newborn. (C-D) Body weight or length of wildtype *RIPCre* Ctrl or LP0.5 and *RIPCre;Rheb* Ctrl or LP0.5 newborn. n=3-7 for *Tsc2* cohort and n=4-7 for *Rheb* cohort.

## Supplemental Figure 5

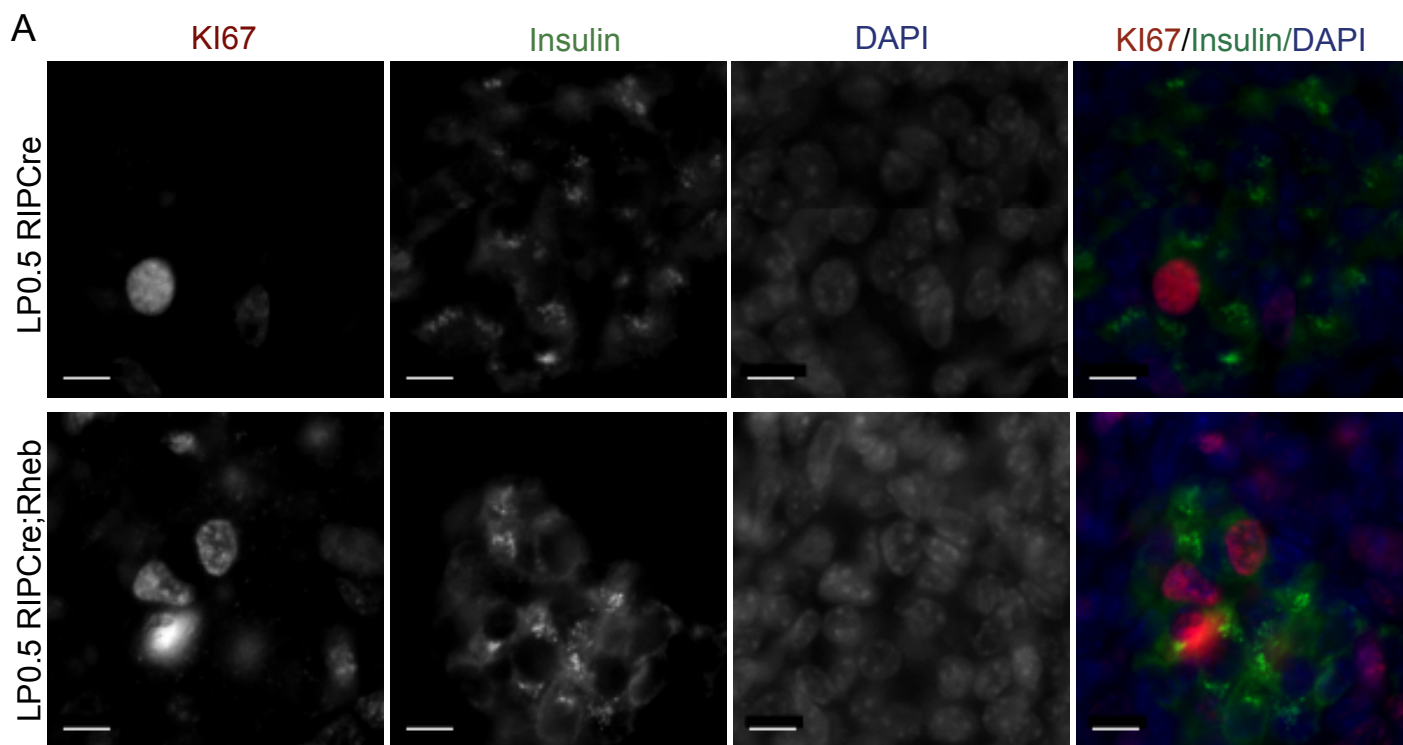

**Supplemental Figure 5. Enhanced proliferation in LP0.5 mice overexpressing Rheb(RIPCre;Rheb) in  $\beta$ -cells.**

**(A)** Proliferation measured by KI67 (red) in insulin-producing cells (green) from islets of LP0.5 mice overexpressing Rheb (*RIPCre;Rheb*) or wild type (*RIPCre*). Scale bar is 100  $\mu$ m.

Supplemental Figure 6

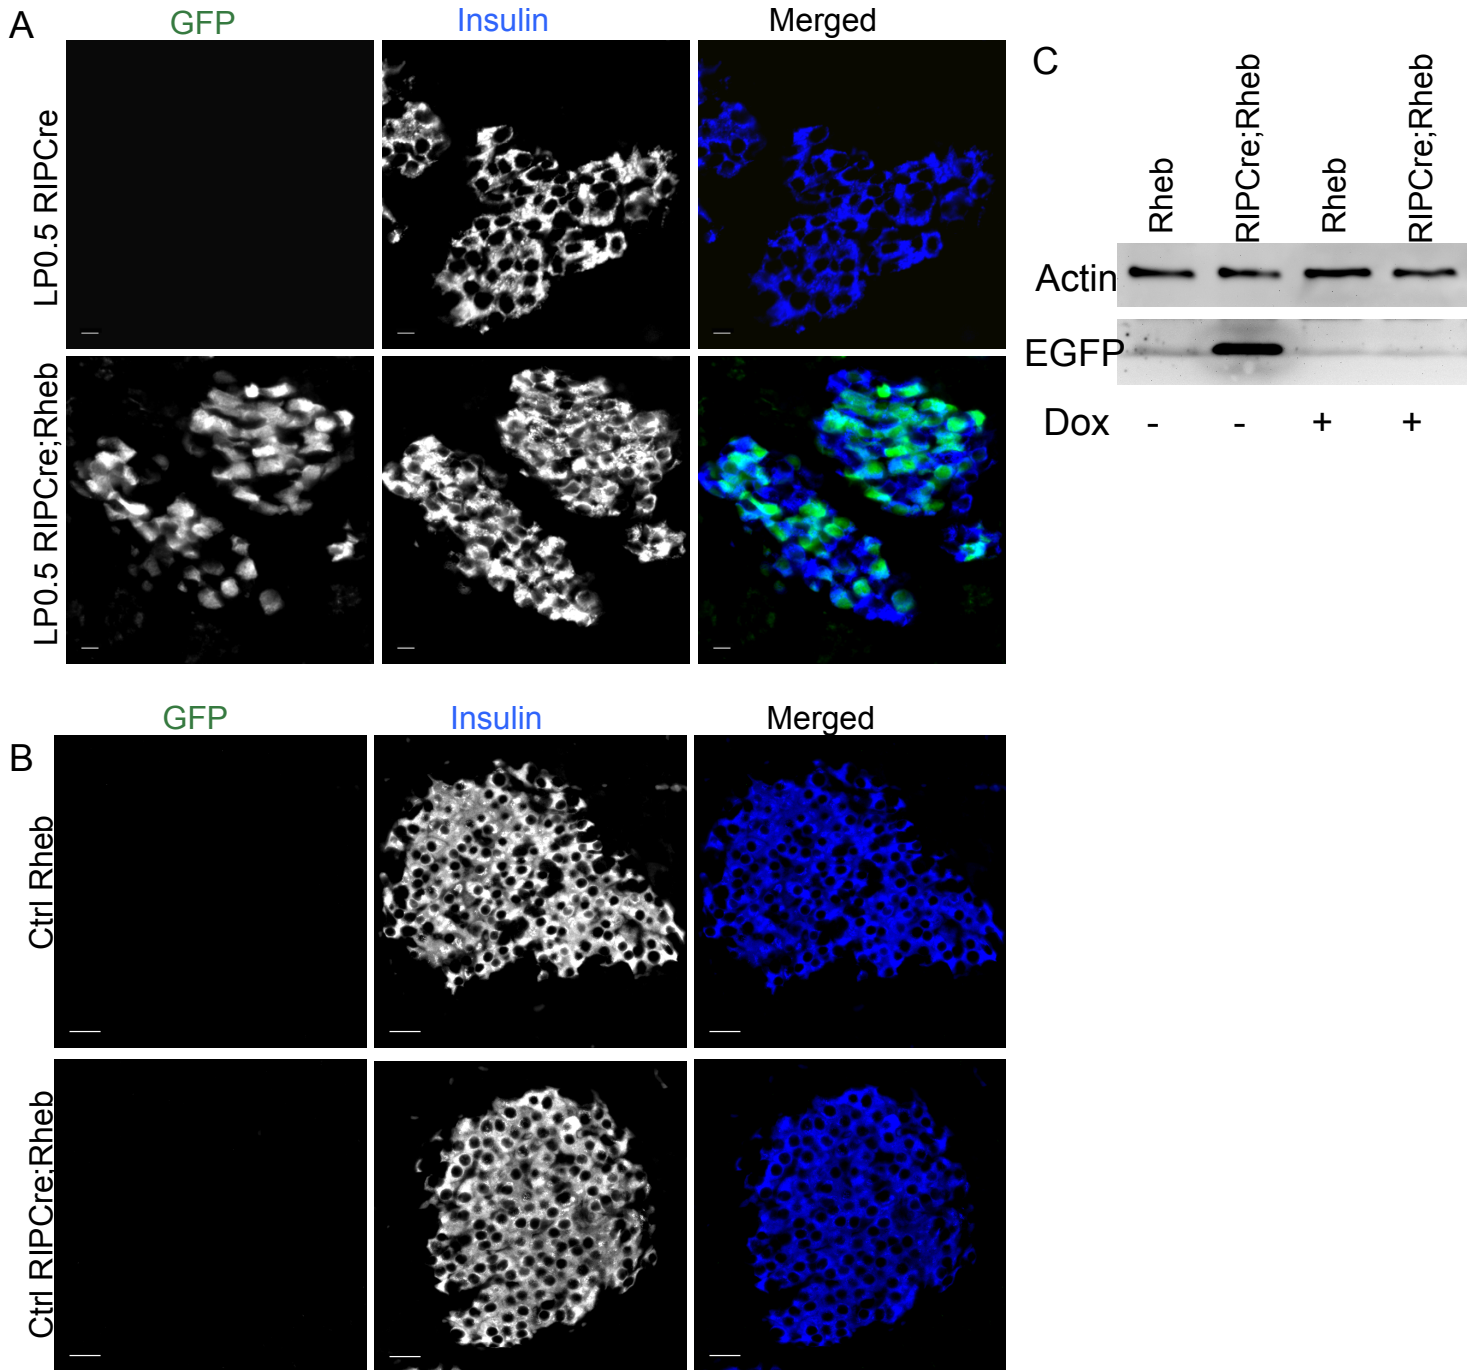

**Supplemental Figure 6. Characterization of islets from *RIPCre;Rheb* mice. (A)** Specific expression of EGFP (Green) in insulin-producing cells (Blue) of LP0.5 offspring overexpressing Rheb (*RIPCre;Rheb*) or wild type (*RIPCre*). Scale bar is 20  $\mu$ m. **(B)** EGFP in control offspring with overexpressing Rheb (*RIPCre;Rheb*) or wild type (*RIPCre*) exposed to Dox throughout life. Scale bar is 100  $\mu$ m. **(C)** Immunoblotting of EGFP in islets isolated from either *RIPCre;Rheb* or *Rheb* mice with or without Dox treatment.

## Supplemental Figure 7

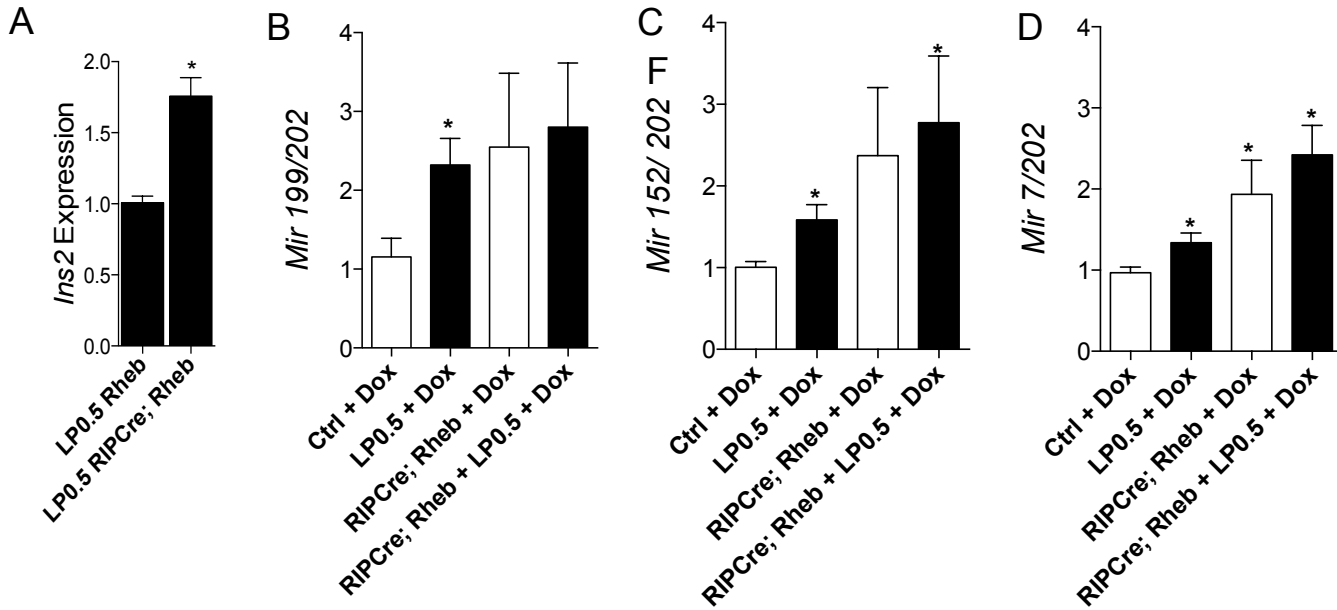

**Supplemental Figure 7. MicroRNAs expression in *RIPCre;Rheb* mice. (A)** *Insulin 2* transcription message from islets of male LP0.5 *Rheb* and LP0.5 *RIPCre;Rheb* mice. **(B-D)** MicroRNAs (miRs) expression in islets from *Rheb* and *RIPCre;Rheb* in Ctrl or LP0.5 diet with Dox after birth to death, n=3. \* $P < 0.05$  vs. Ctrl.

## Supplemental Figure 8

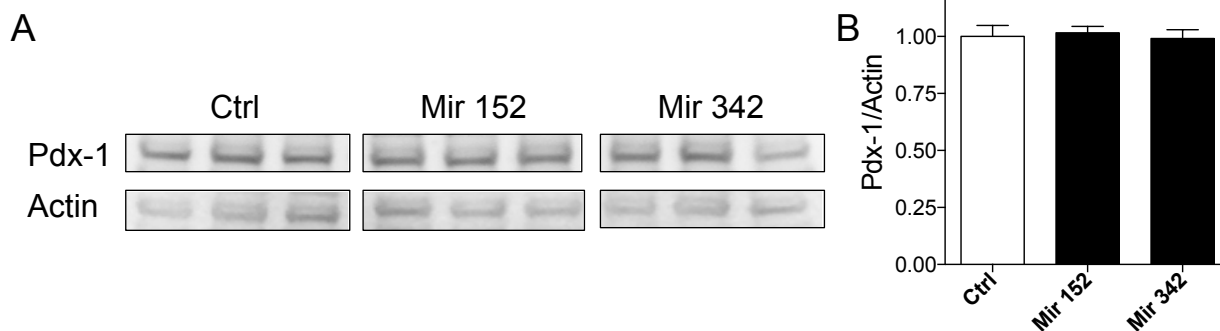

**Supplemental Figure 8. Pdx-1 protein level is not altered in INS-1 cells treated with mimic miR 152 and miR 342.** (A) Pdx-1 protein levels in INS-1 cells treated with mimic miRs 152 and 342 for 24hr. (B) Quantification of Pdx-1 protein corrected to actin, n=3. \*P < 0.05 vs. Ctrl.



## Supplemental Table 1

|                    | Ctrl          |             | LP0.5         |             |
|--------------------|---------------|-------------|---------------|-------------|
|                    | gm%           | kcal%       | gm%           | kcal%       |
| Protein            | 22.7          | 23.5        | 9.3           | 9.6         |
| Carbohydrate       | 64.0          | 66.3        | 77.4          | 80.2        |
| Fat                | 4.4           | 10.2        | 4.4           | 10.2        |
| Total              | 91.1          | 100.0       | 91.1          | 100.0       |
| kcal/gm            | 3.86          |             | 3.86          |             |
| <b>Ingredient</b>  | <b>gm</b>     | <b>kcal</b> | <b>gm</b>     | <b>kcal</b> |
| Casein             | 220           | 880         | 90            | 360         |
| DL-Methionine      | 2             | 8           | 0.8           | 3.2         |
| Corn Starch        | 80            | 320         | 80            | 320         |
| Dextrose           | 536.5         | 2146        | 667.8         | 2671.2      |
| Cellulose, BW200   | 50            | 0           | 50            | 0           |
| Soybean Oil        | 43            | 387         | 43            | 387         |
| Mineral Mix S10001 | 35            | 0           | 35            | 0           |
| Vitamin Mix V10001 | 10            | 40          | 10            | 40          |
| Choline Bitartrate | 2             | 0           | 2             | 0           |
| FD&C Red Dye #40   | 0             | 0           | 0.05          | 0           |
| FD&C Yellow Dye #5 | 0.025         | 0           | 0             | 0           |
| FD&C Blue Dye #1   | 0.025         | 0           | 0             | 0           |
| <b>Total</b>       | <b>978.55</b> | <b>3781</b> | <b>978.65</b> | <b>3781</b> |

**Supplemental Table 1. Diet composition used in the maternal low-protein diet model.** Isocaloric low-protein (9%, D02041002,) or ctrl diet (23% D02041001B) were purchased from Research Diets Inc.

## Supplemental Table 2

| <b>Gene</b>                          | <b>Left</b>           | <b>Right</b>                |
|--------------------------------------|-----------------------|-----------------------------|
| <i>Gck</i>                           | cacaaatgctcccagcca    | ccatttccaggggtagca          |
| <i>Hnf1<math>\alpha</math></i>       | cgctccaccctgggtat     | actccccatgctgtgatg          |
| <i>Hnf4<math>\alpha</math></i>       | ccaagaggtccatggtgtt   | ccgagggacgatgtagcat         |
| <i>Ins1</i>                          | gccatggtgaaacaatgacct | cagagaggaaggtactttggactataa |
| <i>Ins2</i>                          | gaagtggaggaccacaagt   | agtccaaggtctgaaggtc         |
| <i>Igf2</i>                          | cgcttcagttgtctgttcg   | gcagcactctccacgatg          |
| <i>Neurod1</i>                       | cgcagaaggcaagggtgc    | ttggatcatgttccactcc         |
| <i>Tcf2 (Hfn1<math>\beta</math>)</i> | ggtgtagcgcactcctga    | atggctcccctcaccate          |
| <i>Pdx1</i>                          | gaaatccaccaagctcacg   | cgggttccgctgtgtaag          |
| <i>Mtor</i>                          | agaagacagcggggaagg    | gcacttgcctgaggttc           |

**Supplemental Table 2.** These primers were designed by ProbeFinder and were optimized for real-time PCR Assay for the listed mRNA.
